# Supplementary material
Source: publisher figshare collection journal article supplement (https://karger.figshare.com/ndownloader/files/33025775)
Supplement: Supplementary file 1 [file 33025775]

Table 2S

*Individual correlations between intelligibility and utterance length*

| Speaker | Intelligibility x number of syllables | | | |  | Intelligibility x number of words | | | |
| --- | --- | --- | --- | --- | --- | --- | --- | --- | --- |
| *r* | | *p* | | *r* | | *p* | |
| Sp 1  Sp 2  Sp 3  Sp 4  Sp 5  Sp 6  Sp 7  Sp 8  Sp 9  Sp 10  Sp 11 | **-.590**  **-.715**  .060  -.038  .146  -.328  -.315  -.223  -.003  **-.582**  .159 |  | | .043  .009  .853  .906  .652  .297  .318  .486  .993  .047  .622 |  | **-.817**  **-.673**  -.518  .231  .180  -.047  .362  -.324  .061  -.400  .267 |  | | .001  .016  .084  .469  .575  .884  .248  .305  .851  .197  .402 |

*Note.* The correlation coefficient is based on intelligibility scores

and length of utterances from picture description and the Swedish

Test of Intelligibility (STI).
